# Supplementary material for: Social isolation and all-cause mortality: a population-based cohort study in Denmark
Source: PubMed Central journal article supplement (PMC5856842; doi:10.1038/s41598-018-22963-w), 2018-03-16
Supplement: 41598_2018_22963_MOESM1_ESM.pdf [file 41598_2018_22963_MOESM1_ESM.pdf]

**Title:** Social isolation and all-cause mortality: a population-based cohort study in Denmark

Kristina Laugesen,<sup>1,\*</sup> Lisbeth Munksgård Baggesen,<sup>1</sup> Sigrún Alba Jóhannesdóttir Schmidt,<sup>1</sup> M.

Maria Glymour,<sup>2</sup> Mathias Lasgaard,<sup>3,4</sup> Arnold Milstein,<sup>5</sup> Henrik Toft Sørensen,<sup>1,6</sup> Nancy E. Adler,<sup>7</sup>

Vera Ehrenstein<sup>1</sup>

<sup>1</sup> Aarhus University Hospital, Department of Clinical Epidemiology, Aarhus, 8200, Denmark

<sup>2</sup> University of California, Department of Epidemiology and Biostatistics, San Francisco, CA, USA

<sup>3</sup> Central Denmark Region, DEFACTUM, Aarhus, 8200, Denmark

<sup>4</sup> University of Southern Denmark, Department of Psychology, Odense, 5230, Denmark

<sup>5</sup> Stanford University School of Medicine, The Clinical Excellence Research Center (CERC),  
Stanford, CA, USA

<sup>6</sup> Stanford University, Department of Health Research & Policy, Stanford, CA, USA

<sup>7</sup> University of California, Departments of Psychiatry and Pediatrics, San Francisco, CA, USA

\* Kristina.laugesen@clin.au.dk

## SUPPLEMENTARY

**Supplementary Table S1. Distribution of social relations according to Social Network Index, stratified by gender**

|                       | Men                  |       |       |     | Women                |       |       |       |
|-----------------------|----------------------|-------|-------|-----|----------------------|-------|-------|-------|
|                       | Social Network Index |       |       |     | Social Network Index |       |       |       |
|                       | 0/1                  | 2     | 3     | 4   | 0/1                  | 2     | 3     | 4     |
|                       | N                    | N     | N     | N   | N                    | N     | N     | N     |
| Marriage/partnership  |                      |       |       |     |                      |       |       |       |
| Missing               | 115                  | 121   | 25    | 0   | 102                  | 159   | 57    | 0     |
| Married               | 420                  | 2,038 | 3,505 | 954 | 289                  | 1,743 | 4,209 | 1,307 |
| Steady partnership    | 118                  | 392   | 842   | 71  | 38                   | 376   | 984   | 97    |
| Alone/                | 226                  | 306   | 54    | 0   | 84                   | 192   | 65    | 0     |
| Never married/        |                      |       |       |     |                      |       |       |       |
| Never in a steady     |                      |       |       |     |                      |       |       |       |
| partnership           |                      |       |       |     |                      |       |       |       |
| Widow/widower         | 69                   | 70    | 35    | 0   | 139                  | 331   | 240   | 0     |
| Alone due to          | 143                  | 198   | 34    | 0   | 165                  | 336   | 92    | 0     |
| separation or         |                      |       |       |     |                      |       |       |       |
| divorce               |                      |       |       |     |                      |       |       |       |
| Alone after           | 103                  | 168   | 16    | 0   | 87                   | 213   | 32    | 0     |
| termination of        |                      |       |       |     |                      |       |       |       |
| partnership           |                      |       |       |     |                      |       |       |       |
| Frequency of          |                      |       |       |     |                      |       |       |       |
| contacts with friends |                      |       |       |     |                      |       |       |       |
| Missing               | 47                   | 45    | 26    | 7   | 39                   | 99    | 69    | 12    |
| Daily/almost daily    | 209                  | 1,259 | 2,366 | 590 | 209                  | 1,475 | 2,984 | 826   |
| Once or twice per     | 446                  | 1,307 | 1,942 | 411 | 288                  | 1,145 | 2,311 | 524   |
| week                  |                      |       |       |     |                      |       |       |       |
| Once or twice per     | 361                  | 599   | 154   | 17  | 262                  | 578   | 289   | 39    |
| month                 |                      |       |       |     |                      |       |       |       |
| Less than once or     | 129                  | 123   | 30    | 0   | 116                  | 125   | 51    | <5    |
| twice per month       |                      |       |       |     |                      |       |       |       |
| Never                 | 25                   | 5     | <5    | 0   | 13                   | 8     | <5    | <5    |
| Frequency of          |                      |       |       |     |                      |       |       |       |
| contacts with family  |                      |       |       |     |                      |       |       |       |
| Missing               | 49                   | 43    | 12    | <5  | 41                   | 53    | 21    | <5    |
| Daily/almost daily    | 124                  | 788   | 1,528 | 387 | 187                  | 1,319 | 2,761 | 692   |
| Once or twice per     | 333                  | 1,356 | 2,500 | 571 | 311                  | 1,393 | 2,583 | 649   |
| week                  |                      |       |       |     |                      |       |       |       |
| Once or twice per     | 468                  | 894   | 378   | 55  | 259                  | 511   | 276   | 49    |
| month                 |                      |       |       |     |                      |       |       |       |
| Less than once or     | 201                  | 234   | 94    | 9   | 102                  | 141   | 51    | 9     |
| twice per month       |                      |       |       |     |                      |       |       |       |
| Never                 | 42                   | 23    | 7     | <5  | 27                   | 13    | 13    | <5    |
| Frequency of invites  |                      |       |       |     |                      |       |       |       |
| by others             |                      |       |       |     |                      |       |       |       |
| Missing               | 27                   | 31    | 9     | <5  | 27                   | 40    | 24    | 5     |
| Daily/almost daily    | 8                    | 36    | 52    | 14  | 13                   | 49    | 67    | 23    |
| Once or twice per     | 109                  | 655   | 1,348 | 397 | 117                  | 845   | 1,767 | 549   |

|                                           | Men                  |       |       |     | Women                |       |       |       |
|-------------------------------------------|----------------------|-------|-------|-----|----------------------|-------|-------|-------|
|                                           | Social Network Index |       |       |     | Social Network Index |       |       |       |
|                                           | 0/1                  | 2     | 3     | 4   | 0/1                  | 2     | 3     | 4     |
|                                           | N                    | N     | N     | N   | N                    | N     | N     | N     |
| week                                      |                      |       |       |     |                      |       |       |       |
| Once or twice per month                   | 594                  | 1,935 | 2,716 | 553 | 435                  | 1,839 | 3,329 | 768   |
| Less than once or twice per month         | 441                  | 669   | 388   | 59  | 305                  | 645   | 515   | 58    |
| Never                                     | 38                   | 12    | 6     | 0   | 30                   | 12    | <5    | <5    |
| Frequency of religious activities         |                      |       |       |     |                      |       |       |       |
| Missing                                   | 93                   | 138   | 47    | 0   | 117                  | 194   | 85    | 0     |
| Daily                                     | <5                   | <5    | 6     | 9   | <5                   | <5    | 13    | 13    |
| Once or more per week                     | 0                    | 17    | 68    | 161 | 0                    | 20    | 111   | 214   |
| Once or more per month                    | <5                   | 19    | 122   | 321 | <5                   | 35    | 257   | 394   |
| Approximately every second month          | 9                    | 55    | 278   | 534 | 7                    | 81    | 466   | 783   |
| Rare or never                             | 1,113                | 3,106 | 3,998 | 0   | 801                  | 3,097 | 4,773 | 0     |
| Frequency of attending school or lectures |                      |       |       |     |                      |       |       |       |
| Missing                                   | 95                   | 162   | 85    | 37  | 126                  | 233   | 208   | 68    |
| Daily                                     | <5                   | 12    | 19    | 13  | 0                    | 25    | 40    | 10    |
| Once or more per week                     | <5                   | 38    | 127   | 24  | 5                    | 63    | 158   | 51    |
| Once or more per Month                    | 0                    | 31    | 76    | 22  | <5                   | 43    | 100   | 40    |
| Approximately every second month          | 6                    | 45    | 138   | 33  | <5                   | 49    | 140   | 48    |
| Rare or never                             | 1,111                | 3,050 | 4,075 | 896 | 789                  | 3,017 | 5,059 | 1,187 |
| Frequency of course attendance            |                      |       |       |     |                      |       |       |       |
| Missing                                   | 93                   | 144   | 49    | 11  | 112                  | 173   | 118   | 29    |
| Daily                                     | 0                    | 10    | 15    | 11  | <5                   | 9     | 21    | 10    |
| Once or more per week                     | 16                   | 134   | 329   | 117 | 21                   | 264   | 687   | 243   |
| Once or more per month                    | 9                    | 104   | 331   | 200 | 14                   | 163   | 533   | 292   |
| Approximately every second month          | 16                   | 207   | 570   | 210 | 18                   | 329   | 895   | 318   |
| Rare or never                             | 1,083                | 2,739 | 3,225 | 476 | 760                  | 2,492 | 3,451 | 512   |
| Attendance at board meetings              |                      |       |       |     |                      |       |       |       |
| Missing                                   | 95                   | 142   | 61    | 24  | 125                  | 207   | 152   | 53    |
| Daily                                     | 6                    | 57    | 153   | 46  | <5                   | 34    | 75    | 23    |
| Once or more per week                     | 6                    | 92    | 277   | 87  | 5                    | 61    | 166   | 82    |
| Once or more per month                    | 21                   | 274   | 728   | 253 | 10                   | 215   | 679   | 252   |
| Approximately                             | 25                   | 287   | 657   | 153 | 14                   | 278   | 805   | 227   |

|                                              | Men                  |       |       |     | Women                |       |       |       |
|----------------------------------------------|----------------------|-------|-------|-----|----------------------|-------|-------|-------|
|                                              | Social Network Index |       |       |     | Social Network Index |       |       |       |
|                                              | 0/1                  | 2     | 3     | 4   | 0/1                  | 2     | 3     | 4     |
|                                              | N                    | N     | N     | N   | N                    | N     | N     | N     |
| every second month                           |                      |       |       |     |                      |       |       |       |
| Rare or never                                | 1,064                | 2,486 | 2,633 | 462 | 771                  | 2,635 | 3,828 | 767   |
| Participating in sports                      |                      |       |       |     |                      |       |       |       |
| Missing                                      | 100                  | 187   | 132   | 51  | 130                  | 255   | 287   | 89    |
| Daily                                        | 7                    | 91    | 167   | 33  | 7                    | 92    | 234   | 47    |
| Once or more per week                        | 60                   | 762   | 1,916 | 297 | 48                   | 860   | 2,559 | 510   |
| Once or more per month                       | 18                   | 188   | 418   | 110 | 13                   | 171   | 478   | 140   |
| Approximately every second month             | 7                    | 89    | 194   | 61  | 6                    | 96    | 245   | 76    |
| Rare or never                                | 1,025                | 2,021 | 1,692 | 473 | 723                  | 1,956 | 1,902 | 542   |
| Singing in choir                             |                      |       |       |     |                      |       |       |       |
| Missing                                      | 92                   | 134   | 48    | 14  | 117                  | 184   | 103   | 33    |
| Daily                                        | 0                    | 0     | 10    | 9   | 0                    | 6     | 13    | 6     |
| Once or more per week                        | 5                    | 52    | 148   | 81  | 8                    | 78    | 203   | 144   |
| Once or more per month                       | <5                   | 35    | 98    | 51  | <5                   | 36    | 108   | 64    |
| Approximately every second month             | <5                   | 31    | 73    | 45  | <5                   | 27    | 93    | 65    |
| Rare or never                                | 1,116                | 3,082 | 4,142 | 825 | 794                  | 3,099 | 5,185 | 1,092 |
| Scouting                                     |                      |       |       |     |                      |       |       |       |
| Missing                                      | 98                   | 150   | 87    | 25  | 121                  | 213   | 174   | 55    |
| Daily                                        | <5                   | 27    | 62    | 18  | <5                   | 22    | 39    | 18    |
| Once or more per week                        | 16                   | 194   | 464   | 131 | 16                   | 166   | 493   | 220   |
| Once or more per month                       | 8                    | 106   | 300   | 115 | 12                   | 107   | 386   | 177   |
| Approximately every second month             | 6                    | 88    | 235   | 75  | <5                   | 86    | 264   | 120   |
| Rare or never                                | 1,088                | 2,773 | 3,371 | 661 | 774                  | 2,836 | 4,449 | 814   |
| Socializing in community centers             |                      |       |       |     |                      |       |       |       |
| Missing                                      | 92                   | 132   | 34    | 11  | 108                  | 148   | 64    | 18    |
| Daily                                        | <5                   | 13    | 11    | 7   | <5                   | 11    | 20    | 10    |
| Once or more per week                        | 19                   | 157   | 335   | 95  | 23                   | 220   | 462   | 136   |
| Once or more per month                       | 26                   | 171   | 402   | 145 | 26                   | 222   | 508   | 190   |
| Approximately every second month             | 30                   | 356   | 742   | 228 | 16                   | 270   | 828   | 298   |
| Rare or never                                | 1,048                | 2,509 | 2,995 | 539 | 751                  | 2,559 | 3,823 | 752   |
| Attending political or professional meetings |                      |       |       |     |                      |       |       |       |
| Missing                                      | 93                   | 129   | 41    | 8   | 118                  | 175   | 96    | 27    |
| Daily                                        | 0                    | <5    | 9     | 5   | 0                    | <5    | 5     | 5     |
| Once or more per                             | 0                    | 14    | 61    | 19  | <5                   | 15    | 31    | 14    |

|                                  | Men                  |       |       |     | Women                |       |       |       |
|----------------------------------|----------------------|-------|-------|-----|----------------------|-------|-------|-------|
|                                  | Social Network Index |       |       |     | Social Network Index |       |       |       |
|                                  | 0/1                  | 2     | 3     | 4   | 0/1                  | 2     | 3     | 4     |
|                                  | N                    | N     | N     | N   | N                    | N     | N     | N     |
| week                             |                      |       |       |     |                      |       |       |       |
| Once or more per month           | 6                    | 61    | 215   | 84  | 5                    | 66    | 152   | 71    |
| Approximately every second month | 23                   | 230   | 516   | 201 | 14                   | 146   | 432   | 162   |
| Rare or never                    | 1,095                | 2,901 | 3,677 | 708 | 789                  | 3,026 | 4,989 | 1,125 |

**Supplementary Table S2. Association between social isolation and all-cause mortality in Denmark, changing the sequence of covariate adjustment**

|                            | Men              |                |                |                | Women            |                |                |                 |
|----------------------------|------------------|----------------|----------------|----------------|------------------|----------------|----------------|-----------------|
|                            | MRR (95% CI)     |                |                |                | MRR (95% CI)     |                |                |                 |
|                            | Crude            | Model 1        | Model 2        | Model 3        | Crude            | Model 1        | Model 2        | Model 3         |
| Social network index (SNI) |                  |                |                |                |                  |                |                |                 |
| 0/1 vs 4                   | 2.4 (1.7-3.5)    | 2.4 (1.6-3.5)  | 1.9 (1.3-2.9)  | 1.7 (1.1-2.6)  | 2.7 (1.8 -4.0)   | 3.0 (1.9-4.8)  | 2.2 (1.4-3.5)  | 1.6 (0.8-2.9)   |
| 2 vs 4                     | 1.4 (0.98-1.9)   | 1.5 (1.1-2.2)  | 1.4 (0.97-2.0) | 1.1 (0.74-1.7) | 1.4 (0.96-2.0)   | 2.0 (1.3-3.1)  | 1.7 (1.1-2.5)  | 1.2 (0.73-2.1)  |
| 3 vs 4                     | 0.95 (0.68-1.4)  | 1.3 (0.90-1.9) | 1.3 (0.90-1.9) | 1.3 (0.84-1.9) | 0.77 (0.54-1.1)  | 1.3 (0.86-2.0) | 1.2 (0.76-1.8) | 0.98 (0.59-1.6) |
| SNI component (no vs. yes) |                  |                |                |                |                  |                |                |                 |
| Married/partner            | 1.4 (1.1-1.7)    | 1.5 (1.1-1.9)  | 1.5 (1.1-1.9)  | 1.5 (1.2-2.1)  | 2.9 (2.3-3.7)    | 2.1 (1.6-2.7)  | 2.0 (1.5-2.6)  | 1.7 (1.2-2.4)   |
| Social contact             | 1.0 (0.82-1.3)   | 1.0 (0.81-1.3) | 1.0 (0.82-1.3) | 1.1 (0.82-1.4) | 1.1 (0.83-1.6)   | 1.2 (0.88-1.7) | 1.1 (0.75-1.5) | 1.2 (0.72-1.9)  |
| Religious activities       | 0.75 (0.58-0.98) | 1.1 (0.80-1.4) | 1.1 (0.80-1.5) | 1.0 (0.73-1.4) | 0.57 (0.44-0.74) | 1.0 (0.79-1.4) | 1.0 (0.76-1.4) | 0.77 (0.52-1.1) |
| Clubs/organizations        | 2.4 (1.9-2.9)    | 1.6 (1.3-2.0)  | 1.4 (1.1-1.8)  | 1.2 (0.89-1.5) | 1.9 (1.5-2.5)    | 1.6 (1.2-2.1)  | 1.3 (0.97-1.8) | 1.1 (0.70-1.6)  |

Model 1: adjusted for age, education, and income

Model 2: adjusted for age, education, income, self-rated health, Charlson Comorbidity Index, past or present use of antidepressants, and past or present use of strong analgesics

Model 3: adjusted for age, education, income, self-rated health, Charlson Comorbidity Index, past or present use of antidepressants, and past or present use of strong analgesics, smoking, alcohol, body mass index, regular exercise

**Supplementary Table S3. Association between social isolation and all-cause mortality in Denmark, stratified on low income and normal/high income**

|                                   | <b>Low income<sup>a</sup></b> |                  |                   |                   | <b>Normal/High income<sup>b</sup></b> |                   |                   |                   |
|-----------------------------------|-------------------------------|------------------|-------------------|-------------------|---------------------------------------|-------------------|-------------------|-------------------|
|                                   | MRR (95% CI)                  |                  |                   |                   |                                       |                   |                   |                   |
|                                   | Crude                         | Model 1          | Model 2           | Model 3           | Crude                                 | Model 1           | Model 2           | Model 3           |
| <b>Social network index (SNI)</b> |                               |                  |                   |                   |                                       |                   |                   |                   |
| 0/1 vs 4                          | 2.3 (1.7 – 3.1)               | 2.4 (1.8 – 3.4)  | 1.9 (1.3 – 2.8)   | 1.6 (1.0 – 2.4)   | 2.6 (1.7 – 3.9)                       | 3.1 (2.0 – 4.6)   | 1.9 (1.2 – 3.0)   | 1.7 (1.1 – 2.7)   |
| 2 vs 4                            | 1.5 (1.1 – 2.0)               | 1.8 (1.3 – 2.4)  | 1.4 (0.94 – 2.0)  | 1.3 (0.87 – 1.8)  | 1.3 (0.93 – 2.0)                      | 1.8 (1.2 – 2.6)   | 1.3 (0.84 – 1.9)  | 1.3 (0.84 – 1.9)  |
| 3 vs 4                            | 1.0 (0.75 – 1.4)              | 1.1 (0.84 – 1.5) | 1.1 (0.75 – 1.5)  | 1.1 (0.74 – 1.5)  | 1.0 (0.69 – 1.5)                      | 1.4 (0.95 – 2.0)  | 1.2 (0.82 – 1.8)  | 1.2 (0.83 – 1.8)  |
| <b>SNI component (no vs. yes)</b> |                               |                  |                   |                   |                                       |                   |                   |                   |
| Married/partner                   | 1.5 (1.3 – 1.9)               | 1.8 (1.5 – 2.2)  | 1.8 (1.4 – 2.3)   | 1.7 (1.3 – 2.1)   | 1.9 (1.5 – 2.5)                       | 1.9 (1.5 – 2.4)   | 1.7 (1.3 – 2.2)   | 1.4 (1.1 – 1.9)   |
| Social contact                    | 1.4 (1.2 – 1.8)               | 1.3 (1.1 – 1.7)  | 1.3 (0.98 – 1.7)  | 1.3 (1.0 – 1.7)   | 0.90 (0.69 – 1.2)                     | 0.88 (0.67 – 1.2) | 0.85 (0.63 – 1.1) | 0.82 (0.61 – 1.1) |
| Religious activities              | 1.0 (0.80 – 1.2)              | 1.2 (0.94 – 1.4) | 1.1 (0.84 – 1.5)  | 1.1 (0.84 – 1.5)  | 0.70 (0.54 – 0.91)                    | 0.99 (0.75 – 1.3) | 0.87 (0.65 – 1.2) | 0.88 (0.66 – 1.2) |
| Clubs/organizations               | 1.4 (1.2 – 1.7)               | 1.2 (1.0 – 1.5)  | 0.99 (0.77 – 1.3) | 0.87 (0.68 – 1.1) | 2.4 (1.9 – 3.0)                       | 2.1 (1.7 – 2.6)   | 1.6 (1.2 – 2.1)   | 1.5 (1.2 – 2.0)   |

<sup>a</sup> Income below 149,000 Danish Kroners per year

<sup>b</sup> Income above 149,000 Danish Kroners per year

Model 1: adjusted for age and education

Model 2: adjusted for age, education, smoking, alcohol, body mass index, and regular exercise

Model 3: adjusted for age, education, smoking, alcohol, body mass index, regular exercise, self-rated health, Charlson Comorbidity Index, past or present use of antidepressants, and past or present use of strong analgesics

**Supplementary Table S4. Association between social isolation and all-cause mortality in Denmark, excluding persons registered terminal ill or with high level of comorbidity (Charlson Comorbidity Index > 2) 1 year prior to index date**

|                            | <b>Men</b>       |                |                |                | <b>Women</b>     |                |                 |                 |
|----------------------------|------------------|----------------|----------------|----------------|------------------|----------------|-----------------|-----------------|
|                            | MRR (95% CI)     |                |                |                | MRR (95% CI)     |                |                 |                 |
|                            | Crude            | Model 1        | Model 2        | Model 3        | Crude            | Model 1        | Model 2         | Model 3         |
| Social network index (SNI) |                  |                |                |                |                  |                |                 |                 |
| 0/1 vs 4                   | 2.5 (1.7-3.6)    | 2.4 (1.6-3.6)  | 2.0 (1.3-3.2)  | 1.7 (1.1-2.8)  | 2.8 (1.9-4.2)    | 3.3 (2.1-5.3)  | 2.1 (1.2-3.8)   | 1.7 (0.90-3.2)  |
| 2 vs 4                     | 1.3 (0.94-1.9)   | 1.5 (1.0-2.2)  | 1.2 (0.77-1.8) | 1.2 (0.76-1.8) | 1.5 (1.0-2.2)    | 2.3 (1.5-3.5)  | 1.6 (0.94-2.7)  | 1.5 (0.90-2.6)  |
| 3 vs 4                     | 0.94 (0.66-1.3)  | 1.3 (0.88-1.9) | 1.2 (0.81-1.8) | 1.2 (0.82-1.9) | 0.81 (0.56-1.2)  | 1.4 (0.92-2.2) | 1.1 (0.67-1.9)  | 1.1 (0.67-1.9)  |
| SNI component (no vs. yes) |                  |                |                |                |                  |                |                 |                 |
| Married/partner            | 1.4 (1.1-1.8)    | 1.6 (1.2-2.0)  | 1.6 (1.2-2.2)  | 1.6 (1.2-2.2)  | 3.1 (2.4-4.0)    | 2.3 (1.7-2.9)  | 2.2 (1.6-3.0)   | 1.9 (1.2-2.7)   |
| Social contact             | 1.1 (0.85-1.4)   | 1.1 (0.84-1.4) | 1.1 (0.81-1.4) | 1.1 (0.82-1.4) | 1.1 (0.8-1.6)    | 1.2 (0.86-1.7) | 1.3 (0.85-1.9)  | 1.1 (0.67-1.8)  |
| Religious activities       | 0.72 (0.55-0.94) | 1.0 (0.77-1.4) | 1.0 (0.71-1.4) | 1.0 (0.71-1.4) | 0.60 (0.45-0.78) | 1.1 (0.82-1.5) | 0.82 (0.57-1.2) | 0.75 (0.51-1.1) |
| Clubs/organizations        | 2.3 (1.9-2.9)    | 1.6 (1.3-2.0)  | 1.4 (1.0-1.8)  | 1.2 (0.93-1.6) | 1.9 (1.4-2.5)    | 1.5 (1.1-2.1)  | 1.2 (0.86-1.8)  | 1.1 (0.75-1.7)  |

Model 1: adjusted for age, education, and income

Model 2: adjusted for age, education, income, smoking, alcohol, body mass index, and regular exercise

Model 3: adjusted for age, education, income, smoking, alcohol, body mass index, regular exercise, self-rated health, Charlson Comorbidity Index, past or present use of antidepressants, and past or present use of strong analgesics



**Supplementary Table S5. Covariates listed with their categories, their *International Classification of Diseases*, 8th revision (ICD-8) codes, their *International Classification of Diseases*, 10th revision (ICD-10), their anatomical therapeutic chemical (ATC) classification codes or based on the “How are you?” (HHDD) questionnaire.**

| Covariates                                         | ICD-8 codes | ICD-10 codes                                    | ATC codes                                                                                                        | Answers to HHDD questionnaire                           |
|----------------------------------------------------|-------------|-------------------------------------------------|------------------------------------------------------------------------------------------------------------------|---------------------------------------------------------|
| Hypertension (ever before baseline)                | 400-404     | I10-I15                                         |                                                                                                                  | 'Yes, I have it now' or 'yes, I have previously had it' |
| COPD, bronchitis, emphysema (ever before baseline) | 491-492     | J41-44                                          |                                                                                                                  | “Yes, I have it now”, or “yes, I had it in the past”    |
| Diabetes (ever before baseline)                    |             |                                                 | A10                                                                                                              | “Yes, I have it now”, or “yes, I had it in the past”    |
| Dyslipidemia (ever before baseline)                |             |                                                 | C10, B04AA10, BA04AA24, B04AA25, B04AC01-10, B04AB01-B04AB04, B04AD01-03, B04AE01-05, B04AX01-03, and B04AX06-09 |                                                         |
| Antidepressants (ever before baseline)             |             |                                                 | N06A (excluding N06AX12 from 2009 and thereafter)                                                                |                                                         |
| Strong analgesics (ever before baseline)           |             |                                                 | N02A                                                                                                             |                                                         |
| Terminally illness                                 |             | Z515, Z756 or supplementary code ZNAC14, ZPZA05 |                                                                                                                  |                                                         |

**Supplementary Table S6. Algorithm for Charlson Comorbidity Index containing International Classification of Diseases, 10th revision**

|    | Diseases <sup>a</sup>                             | ICD-10                                                                      | Score |
|----|---------------------------------------------------|-----------------------------------------------------------------------------|-------|
| 1  | Myocardial infarction                             | I21;I22;I23                                                                 | 1     |
| 2  | Congestive heart failure                          | I50; I11.0; I13.0; I13.2                                                    | 1     |
| 3  | Peripheral vascular disease                       | I70; I71; I72; I73; I74; I77                                                | 1     |
| 4  | Cerebrovascular disease                           | I60-I69; G45; G46                                                           | 1     |
| 5  | Dementia                                          | F00-F03; F05.1; G30                                                         | 1     |
| 6  | Chronic pulmonary disease                         | J40-J47; J60-J67; J68.4; J70.1; J70.3;<br>J84.1; J92.0; J96.1; J98.2; J98.3 | 1     |
| 7  | Connective tissue disease                         | M05; M06; M08; M09; M30; M31; M32;<br>M33; M34; M35; M36; D86               | 1     |
| 8  | Ulcer disease                                     | K22.1; K25-K28                                                              | 1     |
| 9  | Mild liver disease                                | B18; K70.0-K70.3; K70.9; K71; K73;<br>K74; K76.0                            | 1     |
| 10 | Diabetes type1                                    | E10.0, E10.1; E10.9                                                         | 1     |
|    | Diabetes type2                                    | E11.0; E11.1; E11.9                                                         |       |
| 11 | Hemiplegia                                        | G81; G82                                                                    | 2     |
| 12 | Moderate to severe renal disease                  | I12; I13; N00-N05; N07; N11; N14; N17-<br>N19; Q61                          | 2     |
| 13 | Diabetes with end-organ damage<br>type1 and type2 | E10.2-E10.8<br>E11.2-E11.8                                                  | 2     |
| 14 | Any tumor (except BC)                             | C00-C75 (excluding C64)                                                     | 2     |
| 15 | Leukemia                                          | C91-C95                                                                     | 2     |
| 16 | Lymphoma                                          | C81-C85; C88; C90; C96                                                      | 2     |
| 17 | Moderate to severe liver disease                  | B15.0; B16.0; B16.2; B19.0; K70.4; K72;<br>K76.6; I85                       | 3     |
| 18 | Metastatic solid tumor                            | C76-C80                                                                     | 6     |
| 19 | AIDS                                              | B21-B24                                                                     | 6     |

<sup>a</sup> Diagnosis were assessed up to five years before filling in the “How are you” questionnaire
